# Supplementary figures and images for: The coming of the Greeks to Provence and Corsica: Y-chromosome models of archaic Greek colonization of the western Mediterranean
Source: Springer Nature journal article supplement (doi:10.1186/1471-2148-11-69), 2011-03-14

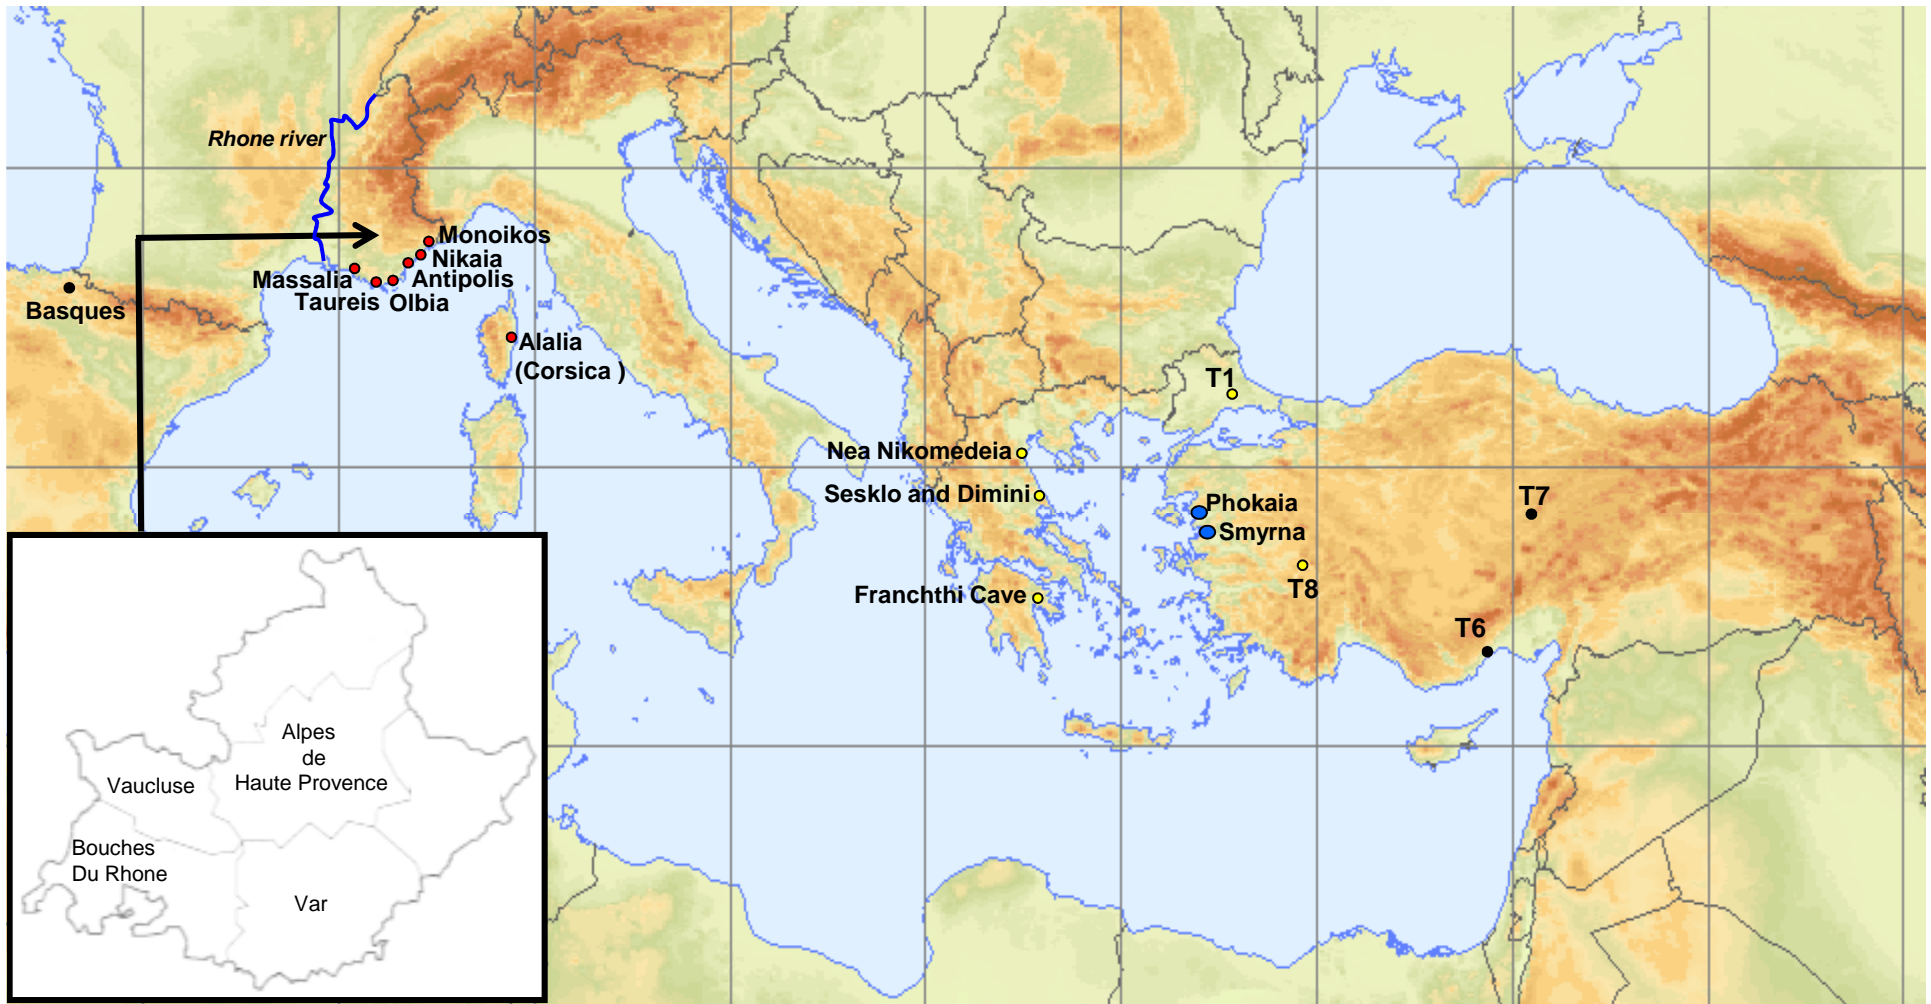

Supplement: 12862_2010_1674_MOESM5_ESM.pdf [file 12862_2010_1674_MOESM5_ESM.pdf]

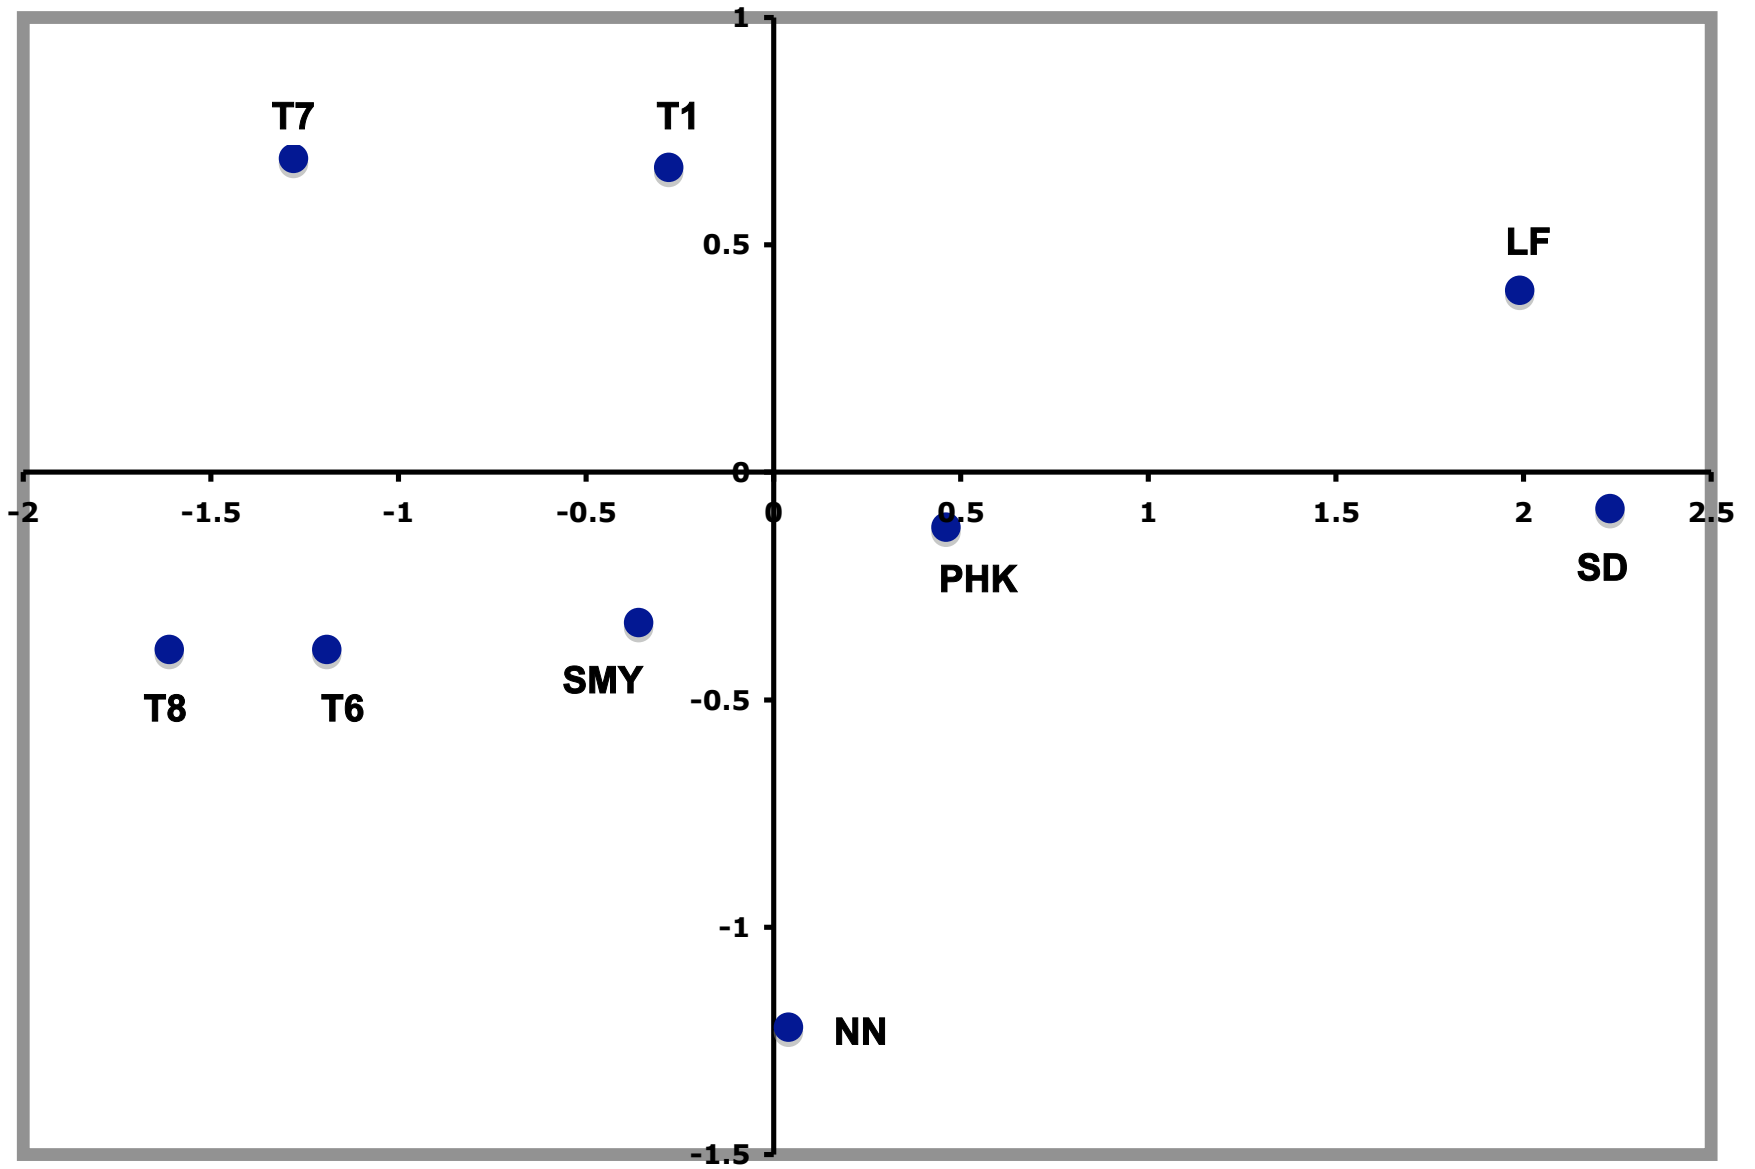

Supplement: 12862_2010_1674_MOESM7_ESM.pdf [file 12862_2010_1674_MOESM7_ESM.pdf]

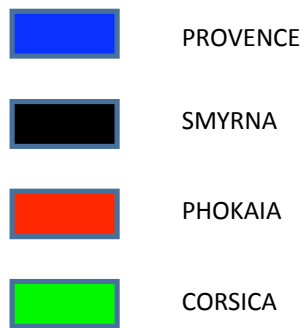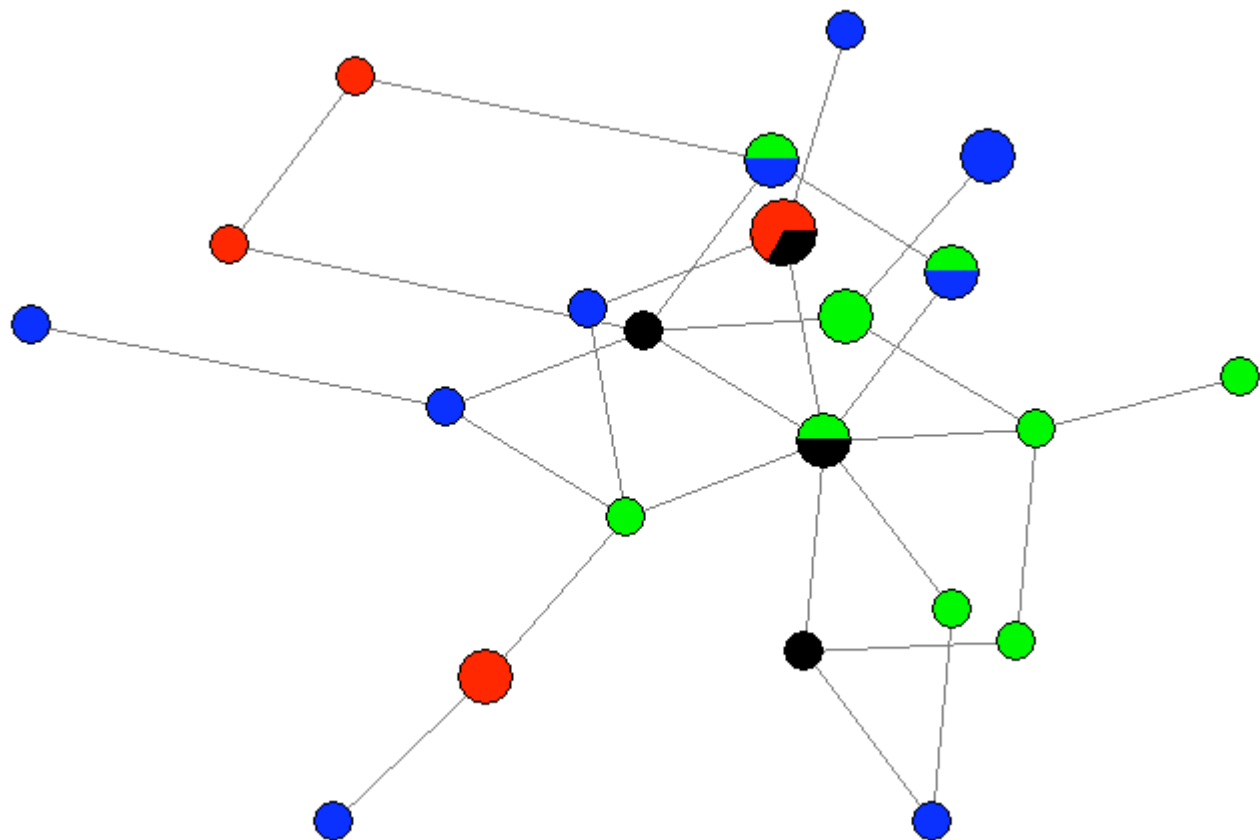

Supplement: 12862_2010_1674_MOESM8_ESM.pdf [file 12862_2010_1674_MOESM8_ESM.pdf]
